# Supplementary material for: Metabolic Innovations Underpinning the Origin and Diversification of the Diatom Chloroplast
Source: MDPI journal article supplement (doi:10.3390/biom9080322), 2019-07-30
Supplement: s1 [file s1]

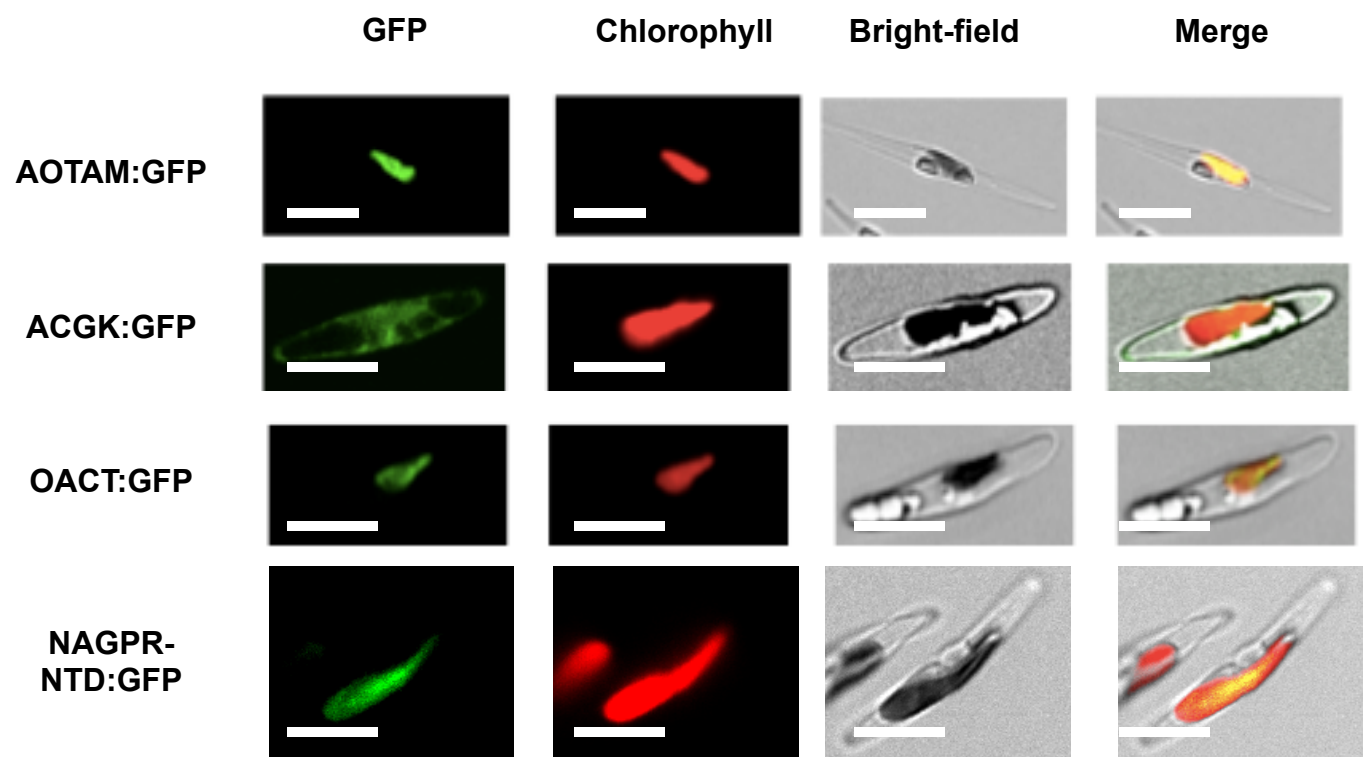

**Figure S1. Experimental localisations of diatom ornithine cycle enzymes.** This figure shows *P. tricornutum* cell lines expressing C-terminal GFP fusions of enzymes implicated in the chloroplast ornithine cycle : AOTAM (acetylornithine transaminase) ; ACGK (acetylglutamate kinase) ; OACT (ornithine acetyltransferase) ; and NAGPR (N-acetyl-gamma-phosphate reductase), using methodology as per <sup>21</sup>. Constructs labelled « NTD » were made with the N-terminal targeting sequence and first 15 aa of the conserved domain of the protein only; all other constructs were made with full-length protein constructs. Scale bars are to 10  $\mu$ m.
