# Supplementary material for: Metabolic Innovations Underpinning the Origin and Diversification of the Diatom Chloroplast
Source: MDPI journal article supplement (doi:10.3390/biom9080322), 2019-07-30
Supplement: s1 [file s1]

..                  :\*
