# Supplementary material for: Metabolic Innovations Underpinning the Origin and Diversification of the Diatom Chloroplast
Source: MDPI journal article supplement (doi:10.3390/biom9080322), 2019-07-30
Supplement: s1 [file s1]

Fig. S3

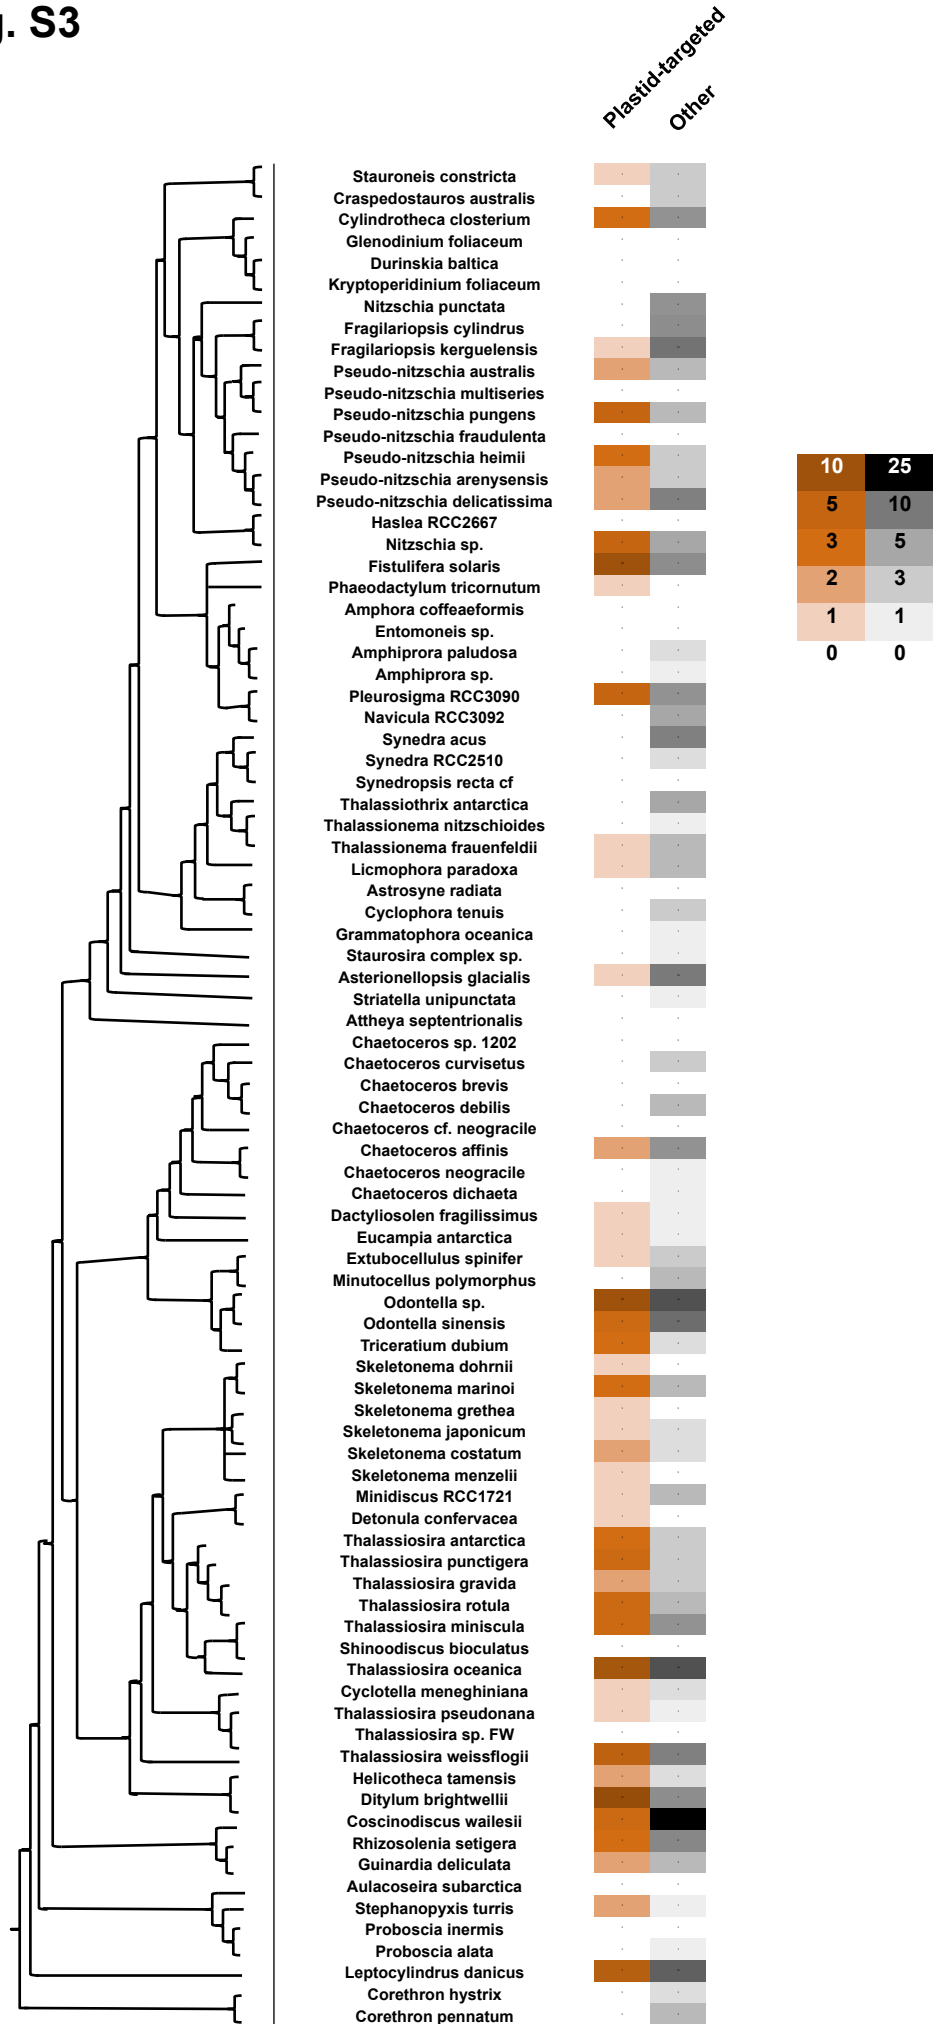

**Figure S3. Evolutionary distributions of diatom iota-carbonic anhydrases.** This figure shows the number of evolutionarily non-redundant iota-carbonic anhydrases, with inferred chloroplast targeting sequences or otherwise, identified by reciprocal BLAST search of the characterised *T. pseudonana* protein (Thaps\_264181), using similar methodology to Fig. S3. Cells are shaded according to the number of copies of proteins identified.
